# Supplementary material for: The Longitudinal Association of Subclinical Hearing Loss With Cognition in the Health, Aging and Body Composition Study
Source: Frontiers journal article supplement (doi:10.3389/fnagi.2021.789515), 2022-03-01
Supplement: Table_1.pdf [file Table_1.pdf]

Supplementary Table 1. Sensitivity analysis (starting at Year 5). Univariable (unadjusted) linear mixed models. Longitudinal association between 10-dB worsening in better ear hearing and cognitive decline in all subjects (n=2,110). \* indicates  $p < 0.05$ . DSST = Digit Symbol Substitution Test. 3MS = Modified Mini-Mental State Exam.

| Cognitive Test <sup>‡</sup> | Estimate (95% Confidence Interval) | p-value |
|-----------------------------|------------------------------------|---------|
| DSST                        | -0.062 (-0.107 to -0.018)          | 0.006*  |
| 3MS                         | -0.032 (-0.062 to -0.001)          | 0.042*  |
| CLOX1                       | 0.008 (-0.008 to 0.024)            | 0.334   |

Supplementary Table 2. Sensitivity analysis (starting at Year 5). Multivariable linear mixed models. Longitudinal association between 10-dB worsening in better ear hearing and cognitive decline in all subjects (n=2,110), adjusting for age, race, sex, education level, smoking status, diabetes, history of stroke, hypertension, hearing aid use. \* indicates  $p < 0.05$ . DSST = Digit Symbol Substitution Test. 3MS = Modified Mini-Mental State Exam.

| Cognitive Test <sup>‡</sup> | Estimate (95% Confidence Interval) | p-value |
|-----------------------------|------------------------------------|---------|
| DSST                        | -0.062 (-0.106 to -0.017)          | 0.006*  |
| 3MS                         | -0.032 (-0.063 to -0.002)          | 0.037*  |
| CLOX1                       | 0.007 (-0.009 to 0.023)            | 0.368   |

Supplementary Table 3. Sensitivity analysis (starting at Year 5). Univariable (unadjusted) linear mixed models. Longitudinal association between 10-dB worsening in better ear hearing and cognitive decline in only subjects with SCHL. \* indicates  $p < 0.05$ . DSST = Digit Symbol Substitution Test. 3MS = Modified Mini-Mental State Exam.

| Cognitive Test | Estimate (95% Confidence Interval) | p-value |
|----------------|------------------------------------|---------|
| DSST           | -0.087 (-0.255 to 0.080)           | 0.305   |
| 3MS            | -0.059 (-0.167 to 0.020)           | 0.291   |
| CLOX1          | 0.038 (-0.021 to 0.097)            | 0.204   |

Supplementary Table 4. Sensitivity analysis (starting at Year 5). Multivariable linear mixed models. Longitudinal association between 10-dB worsening in better ear hearing and cognitive decline in only subjects with SCHL (n=881), adjusting for age, race, sex, education level, smoking status, diabetes, history of stroke, hypertension, hearing aid use. \* indicates  $p < 0.05$ . DSST = Digit Symbol Substitution Test. 3MS = Modified Mini-Mental State Exam.

| Cognitive Test | Estimate (95% Confidence Interval) | p-value |
|----------------|------------------------------------|---------|
| DSST           | -0.076 (-0.242 to 0.091)           | 0.373   |
| 3MS            | -0.060 (-0.168 to 0.049)           | 0.281   |
| CLOX1          | 0.039 (-0.019 to 0.097)            | 0.188   |
